# Supplementary material for: A hybrid quantum dot:MXene bulk heterojunction for an efficient infrared self-powered photodetector
Source: Royal Society of Chemistry journal article supplement (doi:10.1039/d3tc03254j), 2023-01-01
Supplement: d3tc03254j1.pdf [file d3tc03254j1.pdf]

## Supporting Information

# Quantum Dot:MXene Interacted Bulk Heterojunction for Efficient Infrared Self-powered Photodetector

*Junyi Huang<sup>1#</sup>, Jianfeng Ding<sup>1#</sup>, Furui Tan<sup>1\*</sup>, Yueyue Gao<sup>1</sup>, Xiayao Lu<sup>1</sup>, Chen Dong<sup>1</sup>, Gentian Yue<sup>1</sup>, Xiaobao Xu<sup>2\*</sup>, Liming Ding<sup>3\*</sup>*

<sup>1</sup> *Key Laboratory of Photovoltaic Materials, School of Future Technology, Henan University, Zhengzhou 450046, P. R. China.*

<sup>2</sup> *School of Material Science and Engineering, Nanjing University of Science and Technology, Nanjing, 210094, P. R. China.*

<sup>3</sup> *Center of Materials Science and Optoelectronics Engineering, University of Chinese Academy of Sciences, Beijing 100049, P. R. China.*

*Corresponding authors.*

*E-mail address: Furui Tan, [frtan@henu.edu.cn](mailto:frtan@henu.edu.cn); Xiaobao Xu, [xiaobaoxu@njust.edu.cn](mailto:xiaobaoxu@njust.edu.cn); Liming Ding, [ding@nanoctr.cn](mailto:ding@nanoctr.cn)*

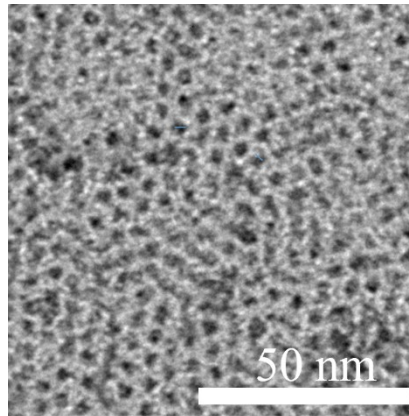

Figure S1. TEM image of PbS QDs.

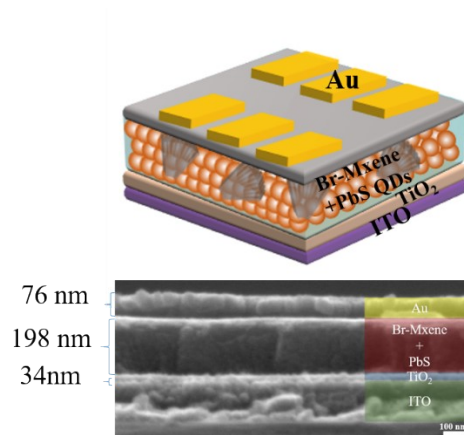

Figure S2. Skeleton of photovoltaic self-powered photodetector and the thickness of each layer extracted from cross-sectional SEM image of the device.

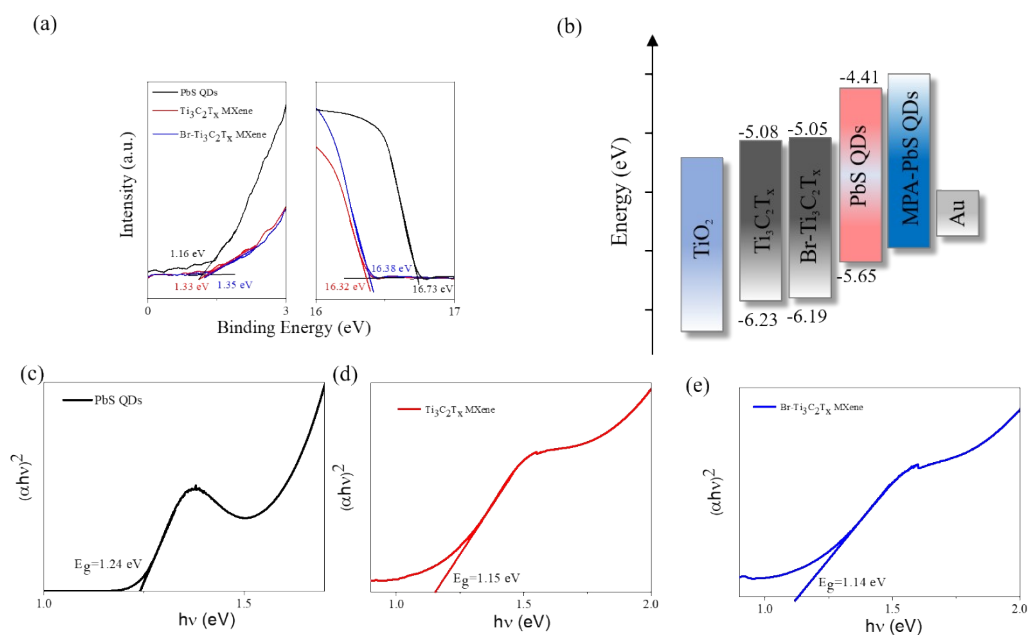

Figure S3. (a) UPS spectra of different films; (b) Schematic illustration of energy level diagram of different; Tauc plot of the (c) PbS QDs film, (d)  $\text{Ti}_3\text{C}_2\text{T}_x$  MXene film and (e) Br- $\text{Ti}_3\text{C}_2\text{T}_x$  MXene film.

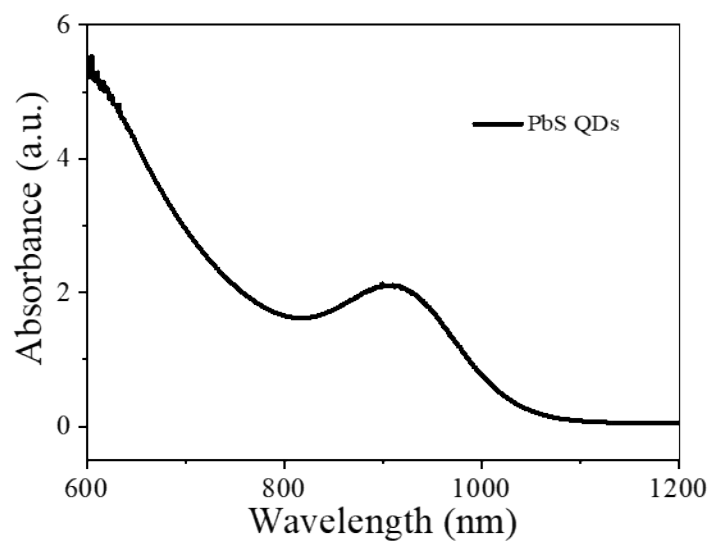

Figure S4. UV-vis-NIR absorption spectra of the PbS QDs.

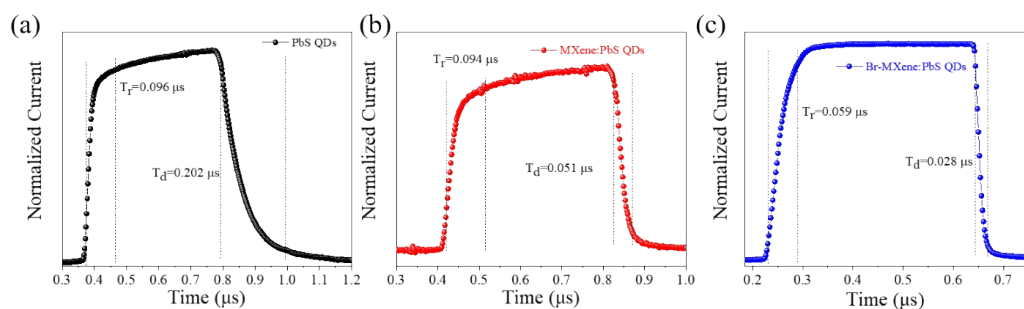

Figure S5. Rising and falling edges of one response cycle for determining the response time of the (a) PbS QDs PDs, (b) MXene: PbS QDs PDs and (c) Br-MXene: PbS QDs PDs.

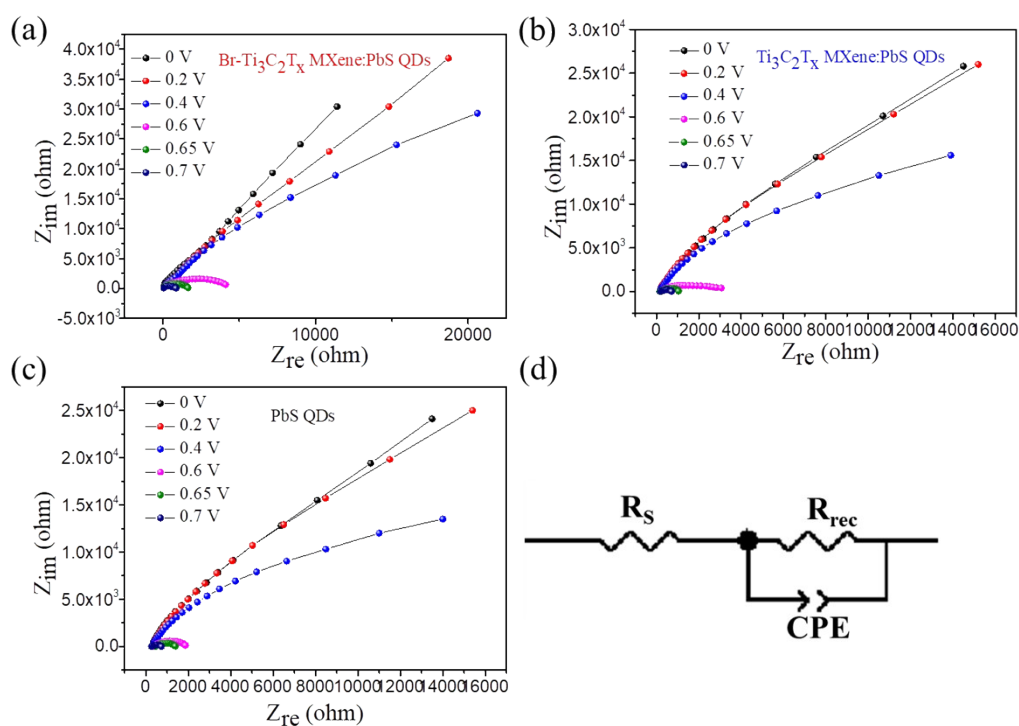

Figure S6. (a) EIS spectra of the Br- $\text{Ti}_3\text{C}_2\text{T}_x$  MXene:PbS QDs BHJ based device under different bias; (b) EIS spectra of the  $\text{Ti}_3\text{C}_2\text{T}_x$  MXene:PbS QDs BHJ based device under different bias; (c) EIS spectra of the pure PbS QDs device under different bias; (d) The equivalent circuit model.

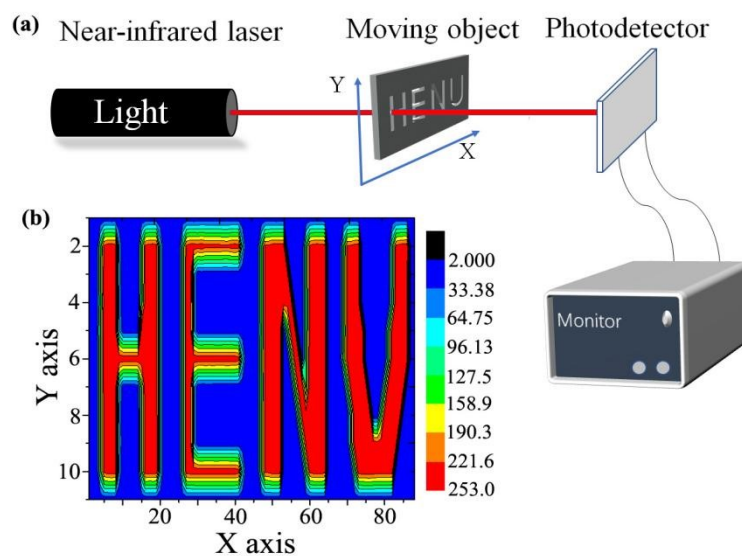

Figure S7. (a) Schematic illustration of the imaging process. (b) The imaging result with the symbol “HENU” as the detecting object.

Table S1 Photovoltaic parameters of the three devices

|                   | $V_{OC}$<br>(V) | $J_{SC}$<br>(mA cm <sup>-2</sup> ) | FF<br>(%) | PCE<br>(%) |
|-------------------|-----------------|------------------------------------|-----------|------------|
| PbS QDs           | 0.632           | 13.5                               | 50.87     | 4.3        |
| MXene:PbS QDs     | 0.645           | 15.9                               | 54.75     | 5.6        |
| Br- MXene:PbS QDs | 0.653           | 17.3                               | 61.12     | 6.9        |

Table S2. Fitting results for the three films shown in Fig. 2d

| Samples          | $A_1$ | $\tau_1$ (ns) | $A_2$ | $\tau_2$ (ns) | $\tau_{ave}$ (ns) |
|------------------|-------|---------------|-------|---------------|-------------------|
| PbS QDs          | 1.44  | 20.50         | 1.79  | 20.50         | 20.50             |
| MXene:PbS QDs    | 2.21  | 16.97         | 1.83  | 16.97         | 16.97             |
| Br-MXene:PbS QDs | 1.99  | 14.30         | 3.02  | 14.30         | 14.30             |
